# Supplementary material for: Electronic subshell splitting controls the atomic structure of charged and neutral silver clusters
Source: Royal Society of Chemistry journal article supplement (doi:10.1039/c3nj01075a), 2013-01-01
Supplement: c3nj01075a.pdf [file c3nj01075a.pdf]

## Supporting Information

# Electronic subshell splitting controls the atomic structure of charged and neutral silver clusters.

Gabriel U. Gamboa, Arthur C. Reber, and Shiv N. Khanna

Department of Physics, Virginia Commonwealth University, Richmond, VA,  
23284, United States

E-mail: [snkhanna@vcu.edu](mailto:snkhanna@vcu.edu),

## Structures

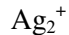

Total Energy -293.67226880

|    |          |          |          |
|----|----------|----------|----------|
| Ag | 0.000000 | 0.000000 | 0.000000 |
| Ag | 0.000000 | 0.000000 | 2.740840 |

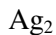

Total Energy -293.96641444

|    |          |          |          |
|----|----------|----------|----------|
| Ag | 0.000000 | 0.000000 | 0.000000 |
| Ag | 0.000000 | 0.000000 | 2.579454 |

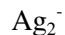

Total Energy -294.00751874

|    |          |          |          |
|----|----------|----------|----------|
| Ag | 0.000000 | 0.000000 | 0.000000 |
| Ag | 0.000000 | 0.000000 | 2.710248 |

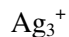

Total Energy -440.72967470

|    |          |           |           |
|----|----------|-----------|-----------|
| Ag | 0.000000 | -0.012480 | 0.031109  |
| Ag | 0.000000 | 0.005877  | -2.664722 |
| Ag | 0.000000 | 2.333135  | -1.300769 |

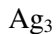

Total Energy -440.94866441

|    |          |          |           |
|----|----------|----------|-----------|
| Ag | 0.000000 | 0.041640 | 0.198160  |
| Ag | 0.000000 | 0.062466 | -2.830886 |
| Ag | 0.000000 | 2.222426 | -1.301656 |

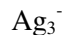

Total Energy -441.03708641

|    |          |          |           |
|----|----------|----------|-----------|
| Ag | 0.000000 | 0.000000 | 0.000000  |
| Ag | 0.000000 | 0.000000 | 2.665838  |
| Ag | 0.000000 | 0.026335 | -2.661235 |

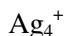

Total Energy -587.72660844

|    |           |           |          |
|----|-----------|-----------|----------|
| Ag | 0.000000  | 0.000000  | 0.000000 |
| Ag | 0.000000  | 0.000000  | 2.687533 |
| Ag | 2.412197  | 0.000000  | 1.345303 |
| Ag | -2.412392 | -0.003964 | 1.345010 |

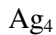

Total Energy -587.97277009

|    |           |           |          |
|----|-----------|-----------|----------|
| Ag | 0.000000  | 0.000000  | 0.000000 |
| Ag | 0.000000  | 0.000000  | 2.624911 |
| Ag | 2.418366  | 0.000000  | 1.312223 |
| Ag | -2.415468 | -0.001430 | 1.311710 |

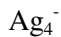

Total Energy -588.03683744

|    |           |          |          |
|----|-----------|----------|----------|
| Ag | 0.000000  | 0.000000 | 0.000000 |
| Ag | 0.000000  | 0.000000 | 2.808294 |
| Ag | 2.355419  | 0.000000 | 1.406016 |
| Ag | -2.362717 | 0.017452 | 1.405995 |

Ag<sub>5</sub><sup>+</sup>

Total Energy -734.75968378

|    |           |           |           |
|----|-----------|-----------|-----------|
| Ag | 0.126320  | -0.017454 | -0.005146 |
| Ag | 1.350166  | 0.995121  | 2.239800  |
| Ag | 0.000897  | -2.324715 | -1.495157 |
| Ag | -1.281045 | 1.083181  | 2.077980  |
| Ag | -0.065338 | -0.006233 | -2.751076 |

Ag<sub>5</sub>

Total Energy -734.98574507

|    |           |           |           |
|----|-----------|-----------|-----------|
| Ag | 0.000000  | 0.000000  | 0.000000  |
| Ag | 0.000000  | 0.000000  | 2.773980  |
| Ag | 2.392666  | 0.000000  | 1.411627  |
| Ag | 2.359525  | 0.000198  | -1.305794 |
| Ag | -2.324766 | -0.000818 | 1.365675  |

Ag<sub>5</sub><sup>-</sup>

Total Energy -735.06418860

|    |           |           |           |
|----|-----------|-----------|-----------|
| Ag | 0.000000  | 0.000000  | 0.000000  |
| Ag | 0.000000  | 0.000000  | 2.821951  |
| Ag | 2.362613  | 0.000000  | 1.544281  |
| Ag | 2.349643  | -0.009000 | -1.283246 |
| Ag | -2.361073 | 0.018670  | 1.259995  |

Ag<sub>6</sub><sup>+</sup>

Total Energy -881.76551294

|    |           |           |           |
|----|-----------|-----------|-----------|
| Ag | 0.032126  | 0.092796  | -0.065808 |
| Ag | -0.406163 | 0.449338  | 2.741007  |
| Ag | 2.083661  | -0.270326 | 1.749370  |
| Ag | -0.652622 | -2.424111 | -1.171495 |
| Ag | -0.243159 | -2.055950 | 1.550597  |
| Ag | 1.940335  | -1.922601 | -0.530856 |

Ag<sub>6</sub>

Total Energy -882.02145828

|    |           |          |           |
|----|-----------|----------|-----------|
| Ag | 0.000000  | 0.000000 | 0.000000  |
| Ag | 0.000000  | 0.000000 | 2.690011  |
| Ag | 0.000000  | 0.275326 | -2.682657 |
| Ag | -2.256174 | 0.946930 | -1.346671 |
| Ag | -4.418141 | 1.674750 | 0.094742  |
| Ag | -2.251665 | 0.839421 | 1.460314  |

Ag<sub>6</sub><sup>-</sup>

Total Energy -882.07472937

|    |           |           |          |
|----|-----------|-----------|----------|
| Ag | -0.000763 | 0.026063  | 0.000045 |
| Ag | 0.001375  | -0.016888 | 2.754591 |

|    |           |           |           |
|----|-----------|-----------|-----------|
| Ag | 0.001374  | 0.077355  | -2.752732 |
| Ag | -2.370291 | -0.190238 | -1.378848 |
| Ag | -4.744473 | -0.454855 | -0.006690 |
| Ag | -2.370255 | -0.239105 | 1.372089  |

Ag<sub>6</sub><sup>-</sup> (Planar)

TOTAL ENERGY -882.07362755

|    |           |           |          |
|----|-----------|-----------|----------|
| Ag | 0.000000  | 0.000000  | 0.000000 |
| Ag | 0.000000  | 0.000000  | 2.876202 |
| Ag | 2.351565  | 0.000000  | 1.437582 |
| Ag | -2.007677 | -1.226089 | 1.436592 |
| Ag | 0.744165  | 2.356402  | 1.441626 |
| Ag | -1.868615 | 1.618738  | 1.443201 |

Ag<sub>7</sub><sup>+</sup>

Total Energy -1028.81308940

|    |           |           |           |
|----|-----------|-----------|-----------|
| Ag | -0.031511 | 0.037347  | 0.045459  |
| Ag | 0.000075  | -0.004463 | 2.797138  |
| Ag | 0.008273  | 0.079124  | -2.708286 |
| Ag | -0.378517 | 2.414593  | -1.299334 |
| Ag | -0.296893 | 2.386978  | 1.457867  |
| Ag | 0.168144  | -2.362644 | 1.389745  |
| Ag | 0.122127  | -2.318834 | -1.366289 |

Ag<sub>7</sub>

Total Energy -1029.03127432

|    |          |           |          |
|----|----------|-----------|----------|
| Ag | 0.000000 | 0.000000  | 0.000000 |
| Ag | 0.000000 | 0.000000  | 2.808600 |
| Ag | 2.530823 | 0.000000  | 1.228591 |
| Ag | 0.878242 | 2.262424  | 1.391356 |
| Ag | 0.871186 | -2.266451 | 1.398185 |
| Ag | 2.276519 | 1.403572  | 3.656857 |
| Ag | 2.292566 | -1.394456 | 3.649516 |

Ag<sub>7</sub><sup>-</sup>

Total Energy -1029.11321265

|    |          |           |           |
|----|----------|-----------|-----------|
| Ag | 0.000000 | 0.000000  | 0.000000  |
| Ag | 0.000000 | 0.000000  | 2.752603  |
| Ag | 2.496698 | 0.000000  | -1.152197 |
| Ag | 2.499659 | 0.047485  | 1.598066  |
| Ag | 0.829854 | -2.356743 | -1.150068 |
| Ag | 3.263341 | -2.309273 | 0.395026  |
| Ag | 0.789324 | -2.377476 | 1.604119  |

Ag<sub>8</sub><sup>+</sup>

Total Energy -1175.82850683

|    |          |           |           |
|----|----------|-----------|-----------|
| Ag | 0.000000 | 0.000000  | 0.000000  |
| Ag | 0.000000 | 0.000000  | 2.747563  |
| Ag | 2.742773 | 0.000000  | -0.882242 |
| Ag | 1.956166 | -1.481190 | 1.393625  |
| Ag | 1.957974 | 1.477175  | 1.398568  |

|    |          |           |           |
|----|----------|-----------|-----------|
| Ag | 0.542569 | 0.008476  | -2.680719 |
| Ag | 1.186721 | 2.326213  | -1.160869 |
| Ag | 1.183950 | -2.317531 | -1.172229 |

Ag<sub>8</sub>

Total Energy -1176.06356085

|    |           |          |          |
|----|-----------|----------|----------|
| Ag | 0.000000  | 0.000000 | 0.000000 |
| Ag | 0.000000  | 0.000000 | 2.805095 |
| Ag | 2.478452  | 0.000000 | 1.499830 |
| Ag | 1.471115  | 2.354734 | 0.357513 |
| Ag | -1.228098 | 2.080403 | 1.276221 |
| Ag | -0.729559 | 2.344549 | 4.015762 |
| Ag | 1.929721  | 2.089950 | 3.172058 |
| Ag | 0.418687  | 4.187108 | 2.100801 |

Ag<sub>8</sub><sup>-</sup>

Total Energy -1176.12201177

|    |           |          |          |
|----|-----------|----------|----------|
| Ag | 0.000000  | 0.000000 | 0.000000 |
| Ag | 0.000000  | 0.000000 | 2.841117 |
| Ag | 2.420853  | 0.000000 | 1.335758 |
| Ag | 1.286846  | 2.498899 | 0.534815 |
| Ag | -1.303836 | 2.022723 | 1.439813 |
| Ag | -0.765876 | 2.311019 | 4.221645 |
| Ag | 1.877327  | 2.020777 | 3.203312 |
| Ag | 0.206405  | 4.218580 | 2.470132 |

Ag<sub>9</sub><sup>+</sup>

Total Energy -1322.86944549

|    |          |           |           |
|----|----------|-----------|-----------|
| Ag | 0.000000 | 0.000000  | 0.000000  |
| Ag | 0.000000 | 0.000000  | 2.703552  |
| Ag | 2.778132 | 0.000000  | -0.988866 |
| Ag | 2.058969 | -1.425951 | 1.374824  |
| Ag | 4.472796 | 0.020381  | 1.115517  |
| Ag | 2.040566 | 1.429982  | 1.378613  |
| Ag | 0.604004 | 0.000733  | -2.693589 |
| Ag | 1.149144 | -2.322881 | -1.145387 |
| Ag | 1.158797 | 2.320781  | -1.151829 |

Ag<sub>9</sub>

Total Energy -1323.06473517

|    |           |           |           |
|----|-----------|-----------|-----------|
| Ag | 0.000000  | 0.000000  | 0.000000  |
| Ag | 0.000000  | 0.000000  | 2.767155  |
| Ag | 2.473709  | 0.000000  | 1.244158  |
| Ag | -1.744559 | -1.781165 | 1.474752  |
| Ag | 0.981296  | -2.411039 | 1.587007  |
| Ag | -2.390362 | -0.860869 | -1.099790 |
| Ag | 0.085050  | -0.861201 | -2.628698 |
| Ag | 2.099680  | -1.778824 | -0.899721 |
| Ag | -0.448077 | -2.926869 | -0.726729 |

Ag<sub>9</sub><sup>-</sup>

Total Energy -1323.15303735

|    |           |          |           |
|----|-----------|----------|-----------|
| Ag | 0.000000  | 0.000000 | 0.000000  |
| Ag | 0.000000  | 0.000000 | 2.773110  |
| Ag | 0.000000  | 0.566321 | -2.990813 |
| Ag | 1.407101  | 2.122736 | -1.162981 |
| Ag | -1.812688 | 1.658953 | 1.516135  |
| Ag | 1.770253  | 1.702658 | 1.521934  |
| Ag | -0.037625 | 3.650972 | 0.777084  |
| Ag | -0.040973 | 2.727374 | 3.519028  |
| Ag | -1.454949 | 2.083976 | -1.165483 |

Ag<sub>10</sub><sup>+</sup>

Total Energy -1469.87260193

|    |           |           |           |
|----|-----------|-----------|-----------|
| Ag | 0.000000  | 0.000000  | 0.000000  |
| Ag | 0.000000  | 0.000000  | 2.816031  |
| Ag | 2.816448  | 0.000000  | -0.005087 |
| Ag | -0.573373 | -2.352681 | 1.404853  |
| Ag | 1.389127  | -4.397295 | 1.400319  |
| Ag | 1.409031  | 2.041664  | 1.404832  |
| Ag | 2.809849  | -0.001822 | 2.805742  |
| Ag | 1.400788  | -2.360207 | -0.595557 |
| Ag | 1.409834  | -2.360740 | 3.396303  |
| Ag | 3.383714  | -2.364413 | 1.398769  |

Ag<sub>10</sub>

TE -1470.08855166

|    |           |          |           |
|----|-----------|----------|-----------|
| Ag | 0.000000  | 0.000000 | 0.000000  |
| Ag | 0.000000  | 0.000000 | 2.762240  |
| Ag | 2.515981  | 0.000000 | 1.382172  |
| Ag | 1.485306  | 2.328782 | -0.010513 |
| Ag | -1.274423 | 2.448691 | -0.574147 |
| Ag | -2.313077 | 0.820301 | 1.392537  |
| Ag | 1.499284  | 2.322019 | 2.748962  |
| Ag | -0.216381 | 4.088608 | 1.377944  |
| Ag | -1.253099 | 2.450941 | 3.345347  |
| Ag | -3.035932 | 3.608134 | 1.389795  |

Ag<sub>10</sub><sup>-</sup>

Total Energy -1470.16842438

|    |           |           |          |
|----|-----------|-----------|----------|
| Ag | 0.000000  | 0.000000  | 0.000000 |
| Ag | 0.000000  | 0.000000  | 2.849254 |
| Ag | 2.461993  | 0.000000  | 1.421880 |
| Ag | 2.172419  | 1.797295  | 3.506497 |
| Ag | -1.653761 | 1.805922  | 1.279564 |
| Ag | -0.502316 | 2.580011  | 3.703207 |
| Ag | -0.913752 | 4.495078  | 1.661491 |
| Ag | 1.486409  | 4.485763  | 3.036212 |
| Ag | 1.064549  | 2.461085  | 1.010437 |
| Ag | 0.842161  | -2.276570 | 1.381019 |

Ag<sub>11</sub><sup>+</sup>

Total Energy -1616.89996212

|    |           |           |           |
|----|-----------|-----------|-----------|
| Ag | -0.464727 | 1.604071  | -0.411832 |
| Ag | -2.401439 | -0.116408 | 0.427431  |
| Ag | 2.184219  | 0.326820  | 0.332680  |
| Ag | -0.070795 | 0.275671  | 2.075695  |
| Ag | 0.053037  | -1.154651 | -0.479888 |
| Ag | -1.234877 | -2.232004 | 2.072002  |
| Ag | 1.572847  | -1.971766 | 2.165030  |
| Ag | -2.052691 | -2.888094 | -0.591105 |
| Ag | 0.389272  | -3.859043 | 0.353864  |
| Ag | 2.840753  | -4.441493 | 1.433218  |
| Ag | 2.628901  | -2.365801 | -0.412296 |

Ag<sub>11</sub>

Total Energy -1617.10524542

|    |           |           |           |
|----|-----------|-----------|-----------|
| Ag | -0.550177 | 0.181485  | -0.052631 |
| Ag | -0.493476 | 0.301164  | 2.763594  |
| Ag | 2.433678  | 0.023739  | -0.245343 |
| Ag | 1.853161  | 1.624714  | 3.887028  |
| Ag | 1.716224  | -1.132473 | 4.008465  |
| Ag | 3.836010  | 1.429259  | 1.827013  |
| Ag | 0.988666  | -1.642442 | 1.398393  |
| Ag | 3.703782  | -1.336185 | 1.938131  |
| Ag | 4.200540  | 0.129481  | 4.394947  |
| Ag | 1.170523  | 1.962512  | 1.242964  |
| Ag | 6.148169  | -0.035454 | 2.482938  |

Ag<sub>11</sub><sup>-</sup>

Total Energy -1617.20160464

|    |           |          |           |
|----|-----------|----------|-----------|
| Ag | 0.000000  | 0.000000 | 0.000000  |
| Ag | 0.000000  | 0.000000 | 2.931574  |
| Ag | 0.000000  | 1.315302 | -2.554733 |
| Ag | -2.045943 | 1.531270 | 4.036760  |
| Ag | -2.348875 | 0.267286 | 1.449183  |
| Ag | 2.444338  | 0.585245 | -1.270009 |
| Ag | 0.858050  | 2.872704 | -0.467800 |
| Ag | 2.074408  | 1.215042 | 1.419995  |
| Ag | -3.312019 | 2.808286 | 1.821408  |
| Ag | -1.851253 | 2.160949 | -0.550601 |
| Ag | -0.457067 | 2.578978 | 1.957126  |

Ag<sub>12</sub><sup>+</sup>

Total Energy -1763.92126824

|    |           |           |           |
|----|-----------|-----------|-----------|
| Ag | 0.000000  | 0.000000  | 0.000000  |
| Ag | 0.000000  | 0.000000  | 2.871303  |
| Ag | 2.643264  | 0.000000  | -0.986584 |
| Ag | 1.193195  | -2.346035 | 3.839427  |
| Ag | 1.799280  | -3.966030 | 1.589326  |
| Ag | -0.172804 | -4.573574 | -0.415491 |
| Ag | 0.177085  | -3.534078 | -3.132363 |
| Ag | 0.521909  | -0.771700 | -2.835865 |

|    |           |           |           |
|----|-----------|-----------|-----------|
| Ag | -1.349795 | -2.124900 | -1.207710 |
| Ag | -0.490677 | -2.380537 | 1.460308  |
| Ag | 1.534564  | -2.503372 | -0.882105 |
| Ag | 2.166297  | -1.131024 | 1.527572  |

Ag<sub>12</sub>

Total Energy -1764.13255873

|    |           |           |           |
|----|-----------|-----------|-----------|
| Ag | 0.000000  | 0.000000  | 0.000000  |
| Ag | 0.000000  | 0.000000  | 2.820808  |
| Ag | 2.422253  | 0.000000  | 1.250638  |
| Ag | 0.944757  | 2.309653  | 1.683649  |
| Ag | -1.753514 | 1.792067  | 1.330760  |
| Ag | -0.287274 | 3.681356  | -0.340892 |
| Ag | -1.655033 | 1.601098  | -1.563060 |
| Ag | 0.364346  | 3.066543  | -3.093625 |
| Ag | 0.452512  | 0.314414  | -2.764765 |
| Ag | 2.763125  | 1.546722  | -3.611202 |
| Ag | 1.959811  | 2.121984  | -0.943932 |
| Ag | 2.829123  | -0.401207 | -1.522266 |

Ag<sub>12</sub><sup>-</sup>

Total Energy -1764.21559993

|    |           |          |           |
|----|-----------|----------|-----------|
| Ag | 0.000000  | 0.000000 | 0.000000  |
| Ag | 0.000000  | 0.000000 | 2.772457  |
| Ag | 2.672671  | 0.000000 | -0.884287 |
| Ag | 3.468235  | 1.427911 | -3.127730 |
| Ag | -1.513184 | 2.270239 | -0.693999 |
| Ag | -2.421263 | 0.630796 | 1.362317  |
| Ag | -0.561032 | 2.634792 | 1.913204  |
| Ag | 1.975275  | 1.499069 | 1.413395  |
| Ag | 3.547562  | 2.643477 | -0.619553 |
| Ag | 2.174779  | 3.933504 | -2.752807 |
| Ag | 0.769230  | 1.606757 | -2.214820 |
| Ag | 0.929871  | 3.650723 | -0.239748 |

Ag<sub>13</sub><sup>+</sup>

Total Energy -1910.94552516

|    |           |           |           |
|----|-----------|-----------|-----------|
| Ag | -0.074138 | 1.308374  | -0.124729 |
| Ag | -0.562913 | -0.659022 | 1.872974  |
| Ag | 1.923886  | -0.671833 | 0.358606  |
| Ag | 1.365330  | -2.817029 | 2.242162  |
| Ag | 2.693670  | -3.255449 | -0.118123 |
| Ag | 2.254390  | 1.376427  | -1.536702 |
| Ag | -0.117977 | 1.971792  | -2.882507 |
| Ag | -2.480605 | 1.946939  | -1.458173 |
| Ag | -2.399774 | 1.403622  | 1.283629  |
| Ag | -1.342270 | -3.244713 | 2.343975  |
| Ag | -0.093130 | -2.688190 | -0.153701 |
| Ag | 0.344712  | -0.749825 | -2.078462 |
| Ag | -2.032740 | -0.762408 | -0.609963 |



Ag<sub>13</sub>  
Total Energy -1911.14498060  
Ag 0.000000 0.000000 0.000000  
Ag 0.000000 0.000000 2.756823  
Ag 1.325507 0.000000 -2.408626  
Ag 3.177764 -1.607805 -1.064474  
Ag 2.262710 -3.719560 0.467840  
Ag -0.057018 -2.500162 1.393369  
Ag 0.559730 -2.497257 -1.413105  
Ag 2.286346 1.602563 2.510896  
Ag 2.236461 3.712431 0.716626  
Ag 2.370733 -1.110434 1.588136  
Ag 2.828515 1.096451 -0.208872  
Ag -0.158660 2.491713 1.509560  
Ag 0.649659 2.512518 -1.241281

Ag<sub>13</sub><sup>-</sup>  
Total Energy -1911.24815663  
Ag 0.000000 0.000000 0.000000  
Ag 0.000000 0.000000 2.725149  
Ag 2.422731 0.000000 1.249453  
Ag 0.290834 -0.028672 5.409531  
Ag 4.678267 -0.025082 2.728255  
Ag 6.967672 -0.116928 4.272084  
Ag 0.631330 0.015815 8.153662  
Ag 2.346525 1.361945 3.827939  
Ag 2.272451 1.691539 6.620876  
Ag 4.637015 0.964535 5.443839  
Ag 2.319309 -1.409750 3.807651  
Ag 4.837725 -1.780399 5.009706  
Ag 2.720149 -1.059144 6.589505

Ag<sub>14</sub><sup>+</sup>  
Total Energy -2057.97625288  
Ag 0.000000 0.000000 0.000000  
Ag 0.000000 0.000000 2.822819  
Ag 2.428723 0.000000 1.366514  
Ag 3.834723 2.207982 2.377307  
Ag 1.054053 2.421380 1.863935  
Ag -1.657646 1.795050 1.398891  
Ag 4.843820 0.792761 0.145830  
Ag 4.586204 1.899232 -2.374834  
Ag 2.453223 0.248759 -1.450026  
Ag -0.047632 0.674631 -2.757017  
Ag -2.312290 1.207059 -1.223437  
Ag 0.065714 2.716302 -0.770250  
Ag 1.956478 2.648122 -2.908224  
Ag 2.871345 2.763859 -0.218855

Ag<sub>14</sub>  
Total Energy -2057.97160095

|    |           |           |           |
|----|-----------|-----------|-----------|
| Ag | 0.000000  | 0.000000  | 0.000000  |
| Ag | 0.000000  | 0.000000  | 2.845810  |
| Ag | 2.402583  | 0.000000  | 1.402633  |
| Ag | 3.799875  | 2.410156  | 1.279237  |
| Ag | 2.208186  | 1.636328  | -0.928484 |
| Ag | -2.541120 | 0.688627  | 3.865720  |
| Ag | -2.424668 | -0.636461 | 1.372427  |
| Ag | -0.352562 | 2.463961  | 4.035273  |
| Ag | 1.045069  | 2.589592  | 1.544890  |
| Ag | 2.308429  | 1.536145  | 3.768177  |
| Ag | -2.418597 | 0.822837  | -1.056152 |
| Ag | 0.147004  | 0.754206  | -2.662417 |
| Ag | -0.400243 | 2.779813  | -0.828369 |
| Ag | -1.747595 | 2.036601  | 1.516709  |

Ag<sub>14</sub><sup>-</sup>

Total Energy -2058.26467339

|    |         |          |          |
|----|---------|----------|----------|
| Ag | 0.00000 | 0.00000  | 0.00000  |
| Ag | 0.00000 | 0.00000  | 2.80151  |
| Ag | 0.94903 | 0.00000  | -2.62023 |
| Ag | 0.72376 | 2.28702  | 1.45070  |
| Ag | 3.42813 | 2.75241  | 1.85838  |
| Ag | 2.08517 | -1.44096 | 3.96653  |
| Ag | 0.17571 | -2.45442 | -1.31448 |
| Ag | 2.65017 | -1.26255 | -0.80978 |
| Ag | 2.83055 | -0.01265 | 1.69471  |
| Ag | 2.66350 | 1.48095  | -0.67339 |
| Ag | 0.17560 | 2.43077  | -1.43985 |
| Ag | 1.08571 | -2.26264 | 1.39727  |
| Ag | 2.08501 | 1.45095  | 3.95133  |
| Ag | 2.03330 | 4.19505  | -0.17737 |

Ag<sub>15</sub><sup>+</sup>

Total Energy -2205.0168005

|    |         |          |          |
|----|---------|----------|----------|
| Ag | 0.00000 | 0.00000  | 0.00000  |
| Ag | 0.00000 | 0.00000  | 2.76795  |
| Ag | 2.55442 | 0.00000  | -1.26901 |
| Ag | 0.89470 | 2.29639  | -1.36999 |
| Ag | 2.84836 | 2.02175  | -3.31200 |
| Ag | 1.70696 | 1.83790  | 1.32359  |
| Ag | 2.36967 | -0.88379 | 1.39014  |
| Ag | 4.88921 | -0.48624 | 0.21651  |
| Ag | 2.49238 | 0.60839  | 3.80552  |
| Ag | 4.42808 | 1.63875  | 1.98299  |
| Ag | 3.66692 | 2.47696  | -0.58555 |
| Ag | 5.11526 | 0.76714  | -2.33396 |
| Ag | 4.68883 | -0.98190 | 3.04579  |
| Ag | 6.41293 | 1.88627  | -0.09596 |
| Ag | 6.96267 | 0.26948  | 2.08218  |

Ag<sub>15</sub>  
Total Energy -2205.21103635

|    |           |          |           |
|----|-----------|----------|-----------|
| Ag | 0.000000  | 0.000000 | 0.000000  |
| Ag | 0.000000  | 0.000000 | 2.903482  |
| Ag | 0.000000  | 1.113984 | -2.721359 |
| Ag | -2.273318 | 1.537065 | 3.861586  |
| Ag | -3.407058 | 2.887735 | 1.606352  |
| Ag | -1.522581 | 3.537079 | -2.740763 |
| Ag | 2.380685  | 0.691504 | -1.325156 |
| Ag | 1.994896  | 1.379900 | 1.398122  |
| Ag | -2.431700 | 0.178314 | 1.431443  |
| Ag | -4.710986 | 1.077422 | -0.058822 |
| Ag | -4.026988 | 3.631058 | -1.197087 |
| Ag | -1.616121 | 4.350938 | 0.014657  |
| Ag | -0.611072 | 2.470828 | 1.805897  |
| Ag | 0.635921  | 2.830248 | -0.663166 |
| Ag | -2.118754 | 1.608321 | -0.895581 |

Ag<sub>15</sub><sup>-</sup>  
Total Energy -2205.30684300

|    |           |          |           |
|----|-----------|----------|-----------|
| Ag | 0.000000  | 0.000000 | 0.000000  |
| Ag | 0.000000  | 0.000000 | 2.803627  |
| Ag | 2.448933  | 0.000000 | -1.356632 |
| Ag | -0.856394 | 2.499730 | 3.780408  |
| Ag | 1.789183  | 2.375044 | -0.007950 |
| Ag | 1.777237  | 2.369674 | 2.797870  |
| Ag | 2.476218  | 0.000737 | 1.455120  |
| Ag | 0.375792  | 1.569857 | -2.389416 |
| Ag | -1.772288 | 3.173872 | -3.141399 |
| Ag | -2.226843 | 0.979984 | -1.444555 |
| Ag | 0.213991  | 4.232464 | -1.452567 |
| Ag | -2.759859 | 3.934844 | 2.289086  |
| Ag | -2.352139 | 3.622785 | -0.459762 |
| Ag | -0.123075 | 3.817487 | 1.336101  |
| Ag | -1.922075 | 1.428224 | 1.342268  |
